# Supplementary material for: Effects of 5-Hydroxymethylcytosine Epigenetic Modification on the Stability and Molecular Recognition of VEGF i-Motif and G-Quadruplex Structures
Source: PubMed Central journal article supplement (PMC5976936; doi:10.1155/2018/9281286), 2018-05-16
Supplement: 9281286.f1.pdf [file 9281286.f1.pdf]

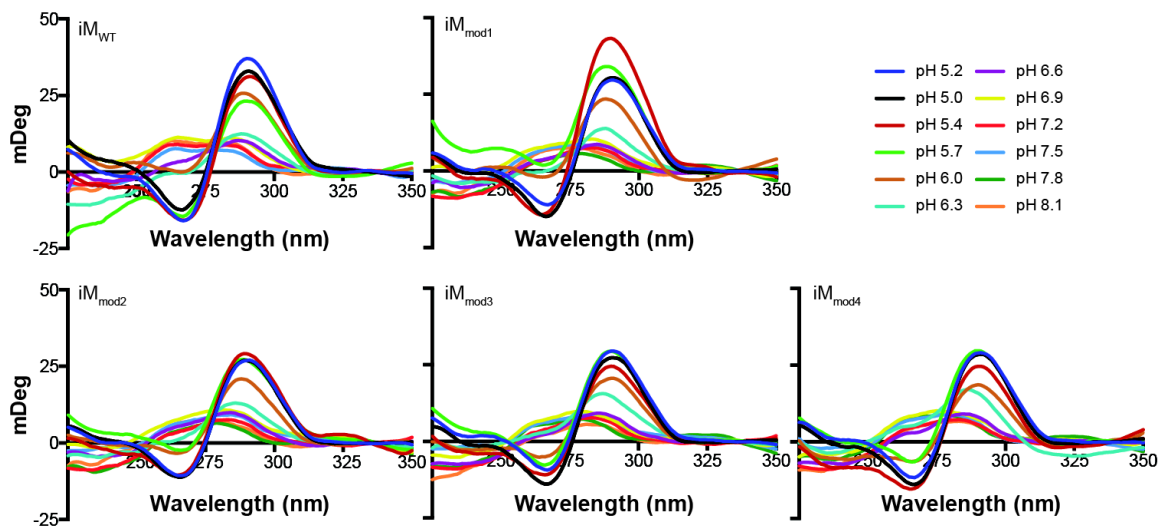

**Figure S1.** pH dependence of iM formation in the native ( $iM_{WT}$ ) and modified ( $iM_{mod1-4}$ ) sequences. ECD spectra of all C-rich sequences were obtained at a range of pH's (5.0 – 8.1) at 20 °C.

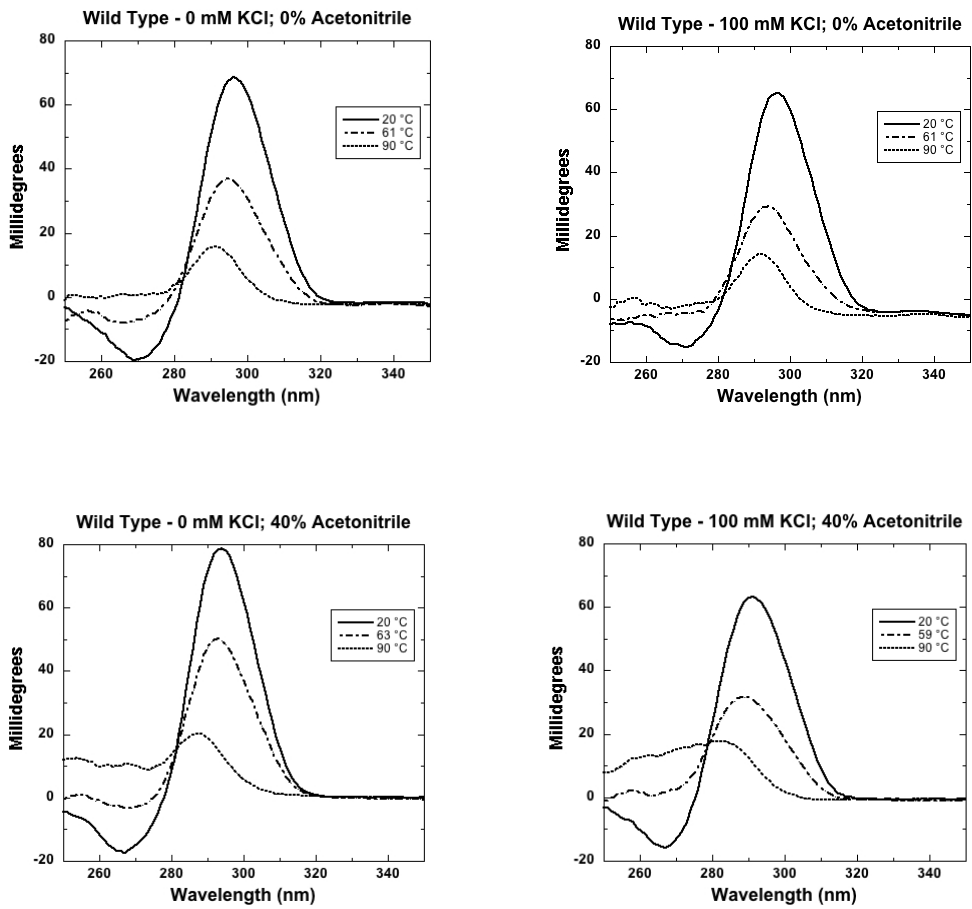

**Figure S2.** ECD spectra of VEGF iM<sub>WT</sub> at pH 5.4 exposed to 0 KCl (mM) / 0% acetonitrile, 100 mM KCl by itself, 40% acetonitrile by itself, and both 100 mM KCl / 40% acetonitrile present. Each spectra was collected at 20 °C, the determined T<sub>M</sub>, and 90 °C.

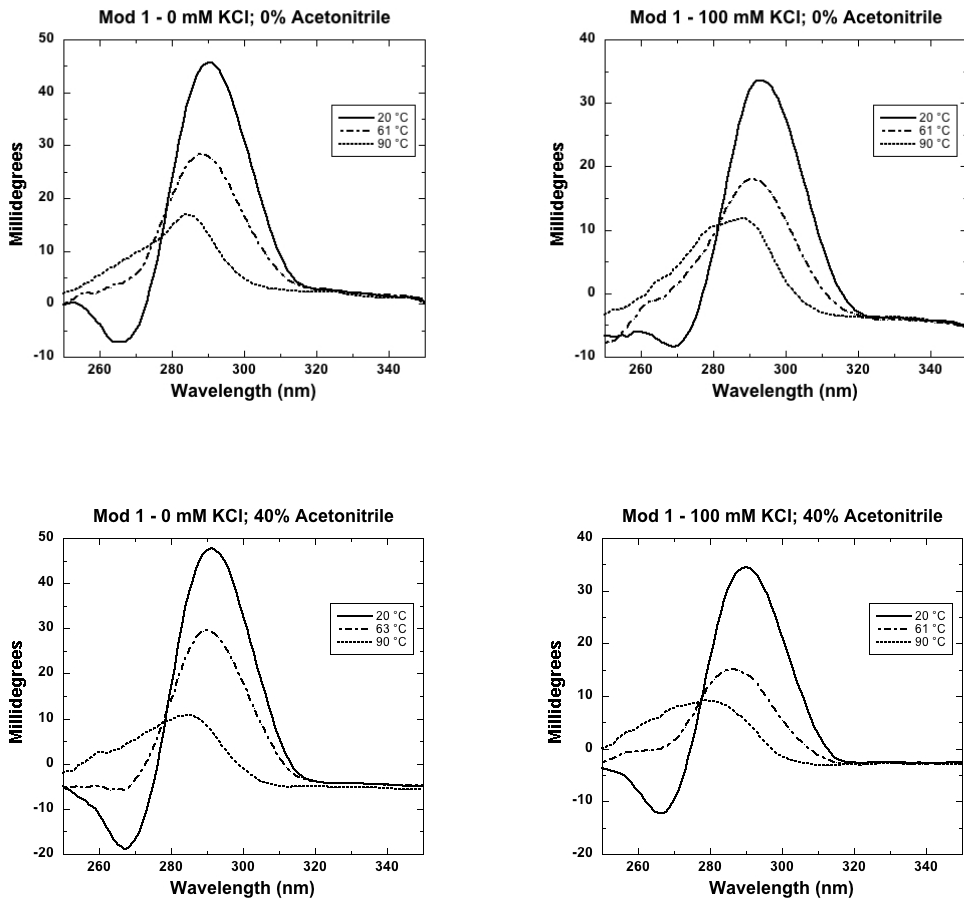

**Figure S3.** ECD spectra of VEGF  $iM_{mod1}$  at pH 5.4 exposed to 0 KCl (mM) / 0% acetonitrile, 100 mM KCl by itself, 40% acetonitrile by itself, and both 100 mM KCl / 40% acetonitrile present. Each spectra was collected at 20 °C, the determined  $T_M$ , and 90 °C.

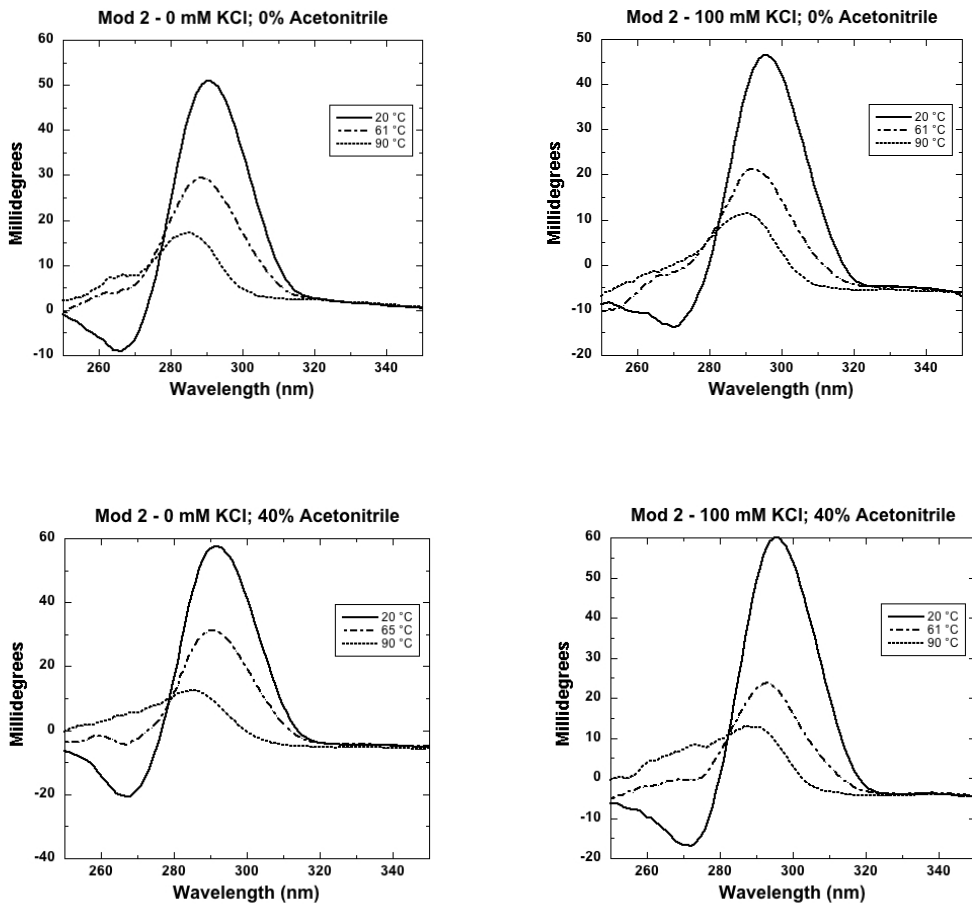

**Figure S4.** ECD spectra of VEGF  $iM_{mod2}$  at pH 5.4 exposed to 0 KCl (mM) / 0% acetonitrile, 100 mM KCl by itself, 40% acetonitrile by itself, and both 100 mM KCl / 40% acetonitrile present. Each spectra was collected at 20 °C, the determined  $T_M$ , and 90 °C.

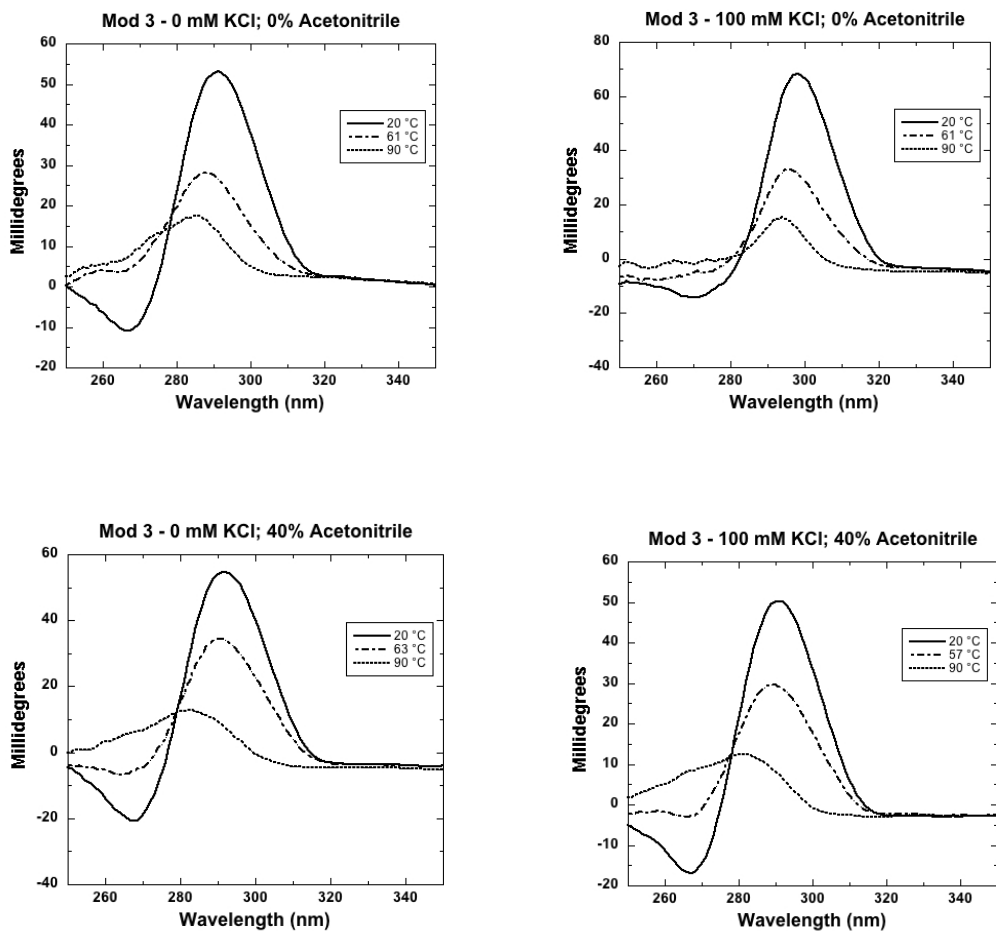

**Figure S5.** ECD spectra of VEGF  $iM_{mod3}$  at pH 5.4 exposed to 0 KCl (mM) / 0% acetonitrile, 100 mM KCl by itself, 40% acetonitrile by itself, and both 100 mM KCl / 40% acetonitrile present. Each spectra was collected at 20 °C, the determined  $T_M$ , and 90 °C.

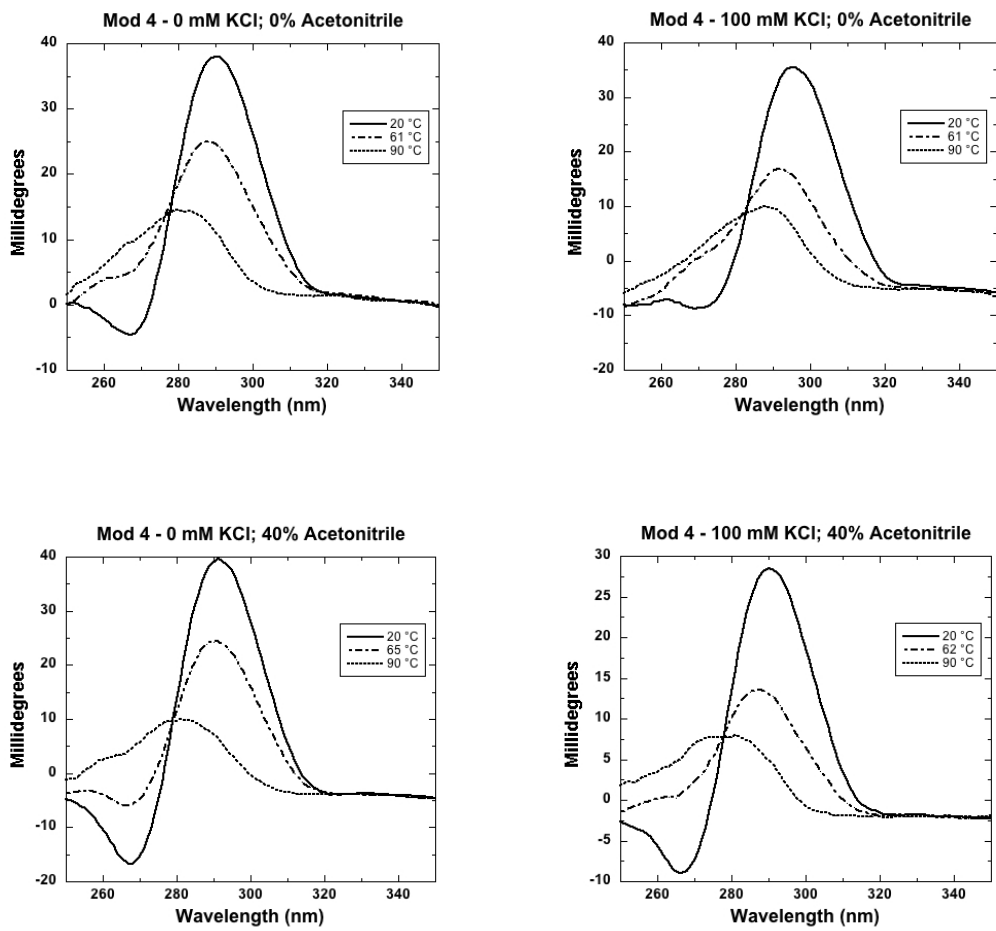

**Figure S6.** ECD spectra of VEGF  $iM_{mod4}$  at pH 5.4 exposed to 0 KCl (mM) / 0% acetonitrile, 100 mM KCl by itself, 40% acetonitrile by itself, and both 100 mM KCl / 40% acetonitrile present. Each spectra was collected at 20 °C, the determined  $T_M$ , and 90 °C.

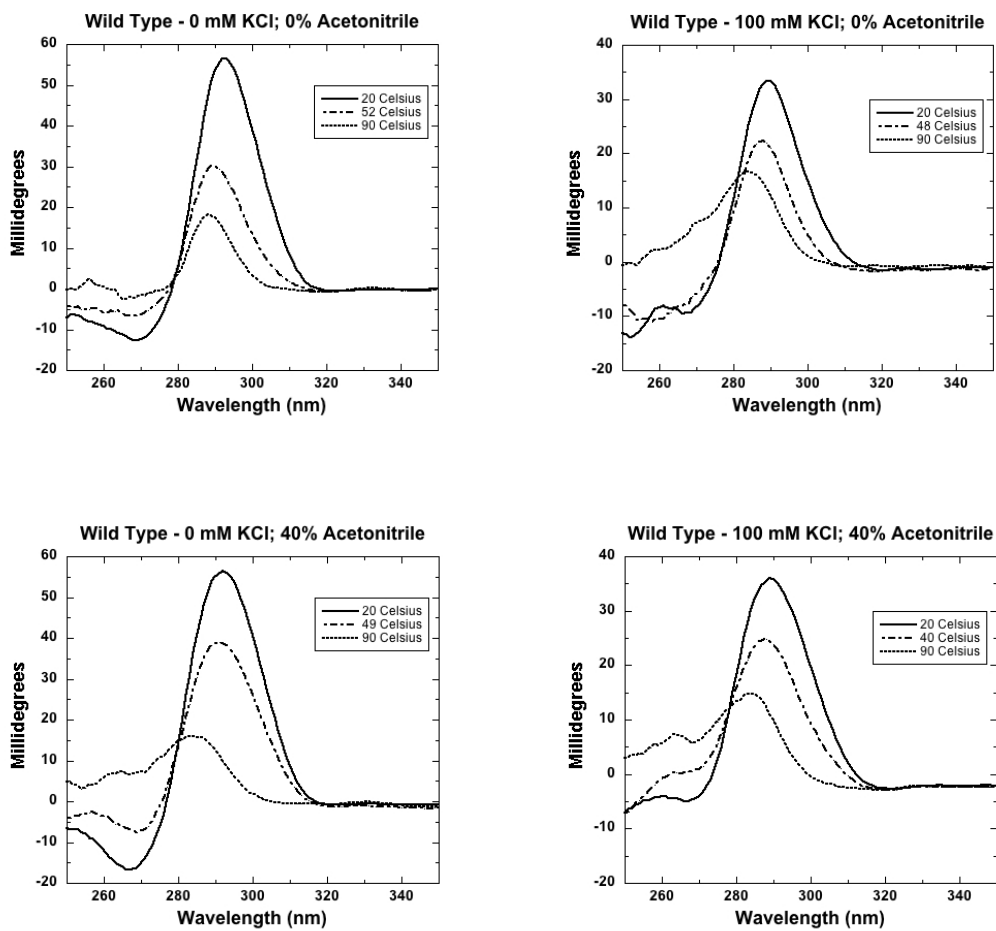

**Figure S7.** ECD spectra of VEGF iM<sub>WT</sub> at the pKa exposed to 0 KCl (mM) / 0% acetonitrile, 100 mM KCl by itself, 40% acetonitrile by itself, and both 100 mM KCl / 40% acetonitrile present. Each spectra was collected at 20 °C, the determined T<sub>M</sub>, and 90 °C.

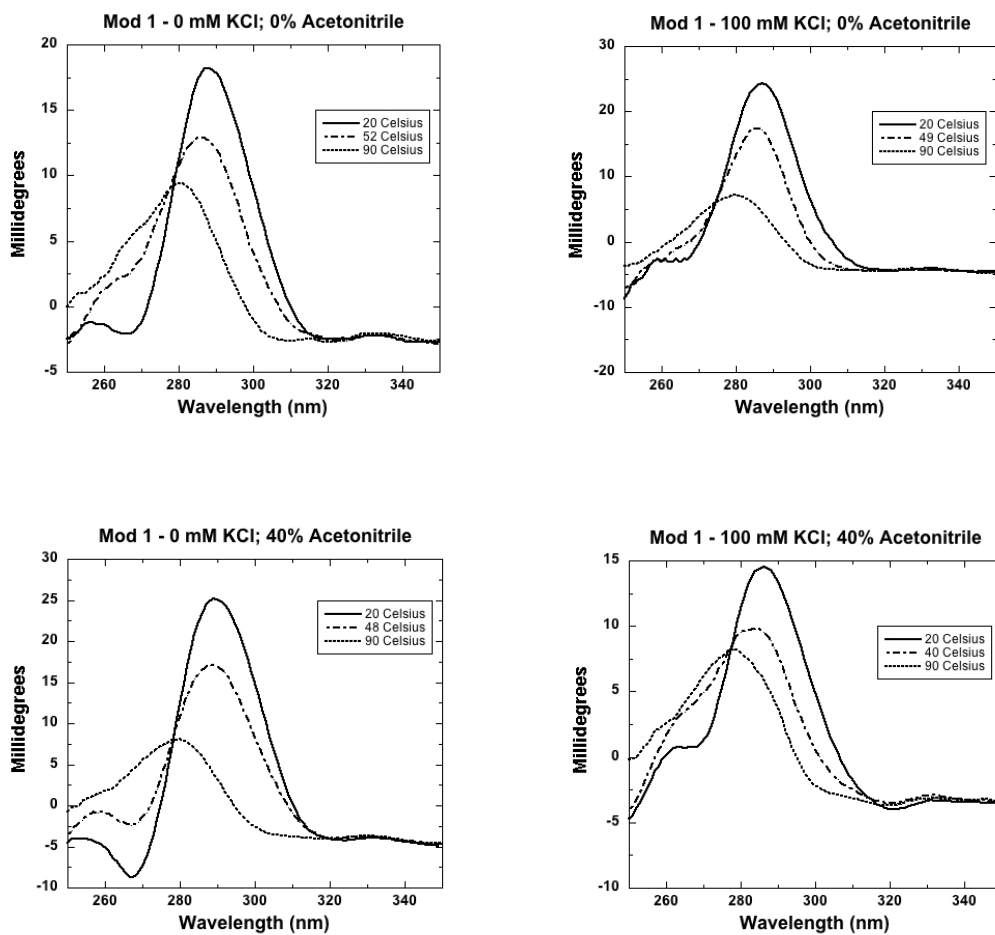

**Figure S8.** ECD spectra of VEGF  $iM_{mod1}$  at the pKa exposed to 0 KCl (mM) / 0% acetonitrile, 100 mM KCl by itself, 40% acetonitrile by itself, and both 100 mM KCl / 40% acetonitrile present. Each spectra was collected at 20 °C, the determined  $T_M$ , and 90 °C.



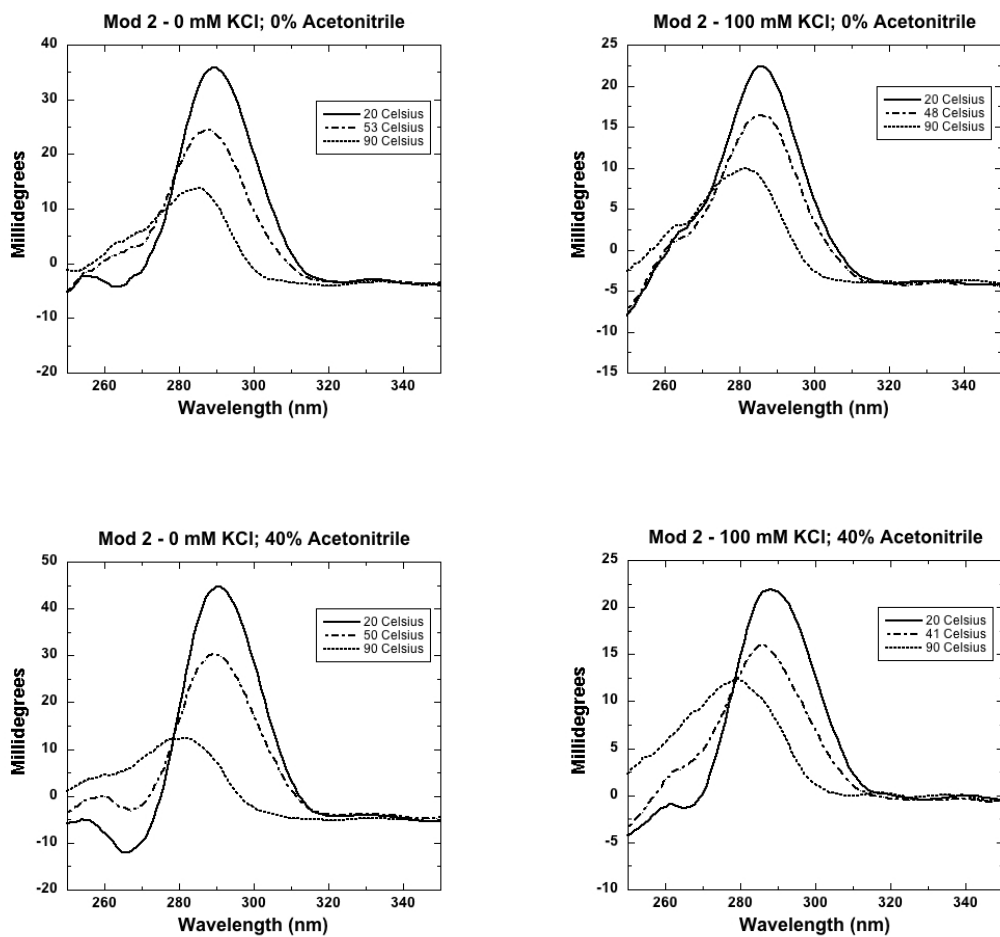

**Figure S9.** ECD spectra of VEGF  $iM_{mod2}$  at the pKa exposed to 0 KCl (mM) / 0% acetonitrile, 100 mM KCl by itself, 40% acetonitrile by itself, and both 100 mM KCl / 40% acetonitrile present. Each spectra was collected at 20 °C, the determined  $T_M$ , and 90 °C.

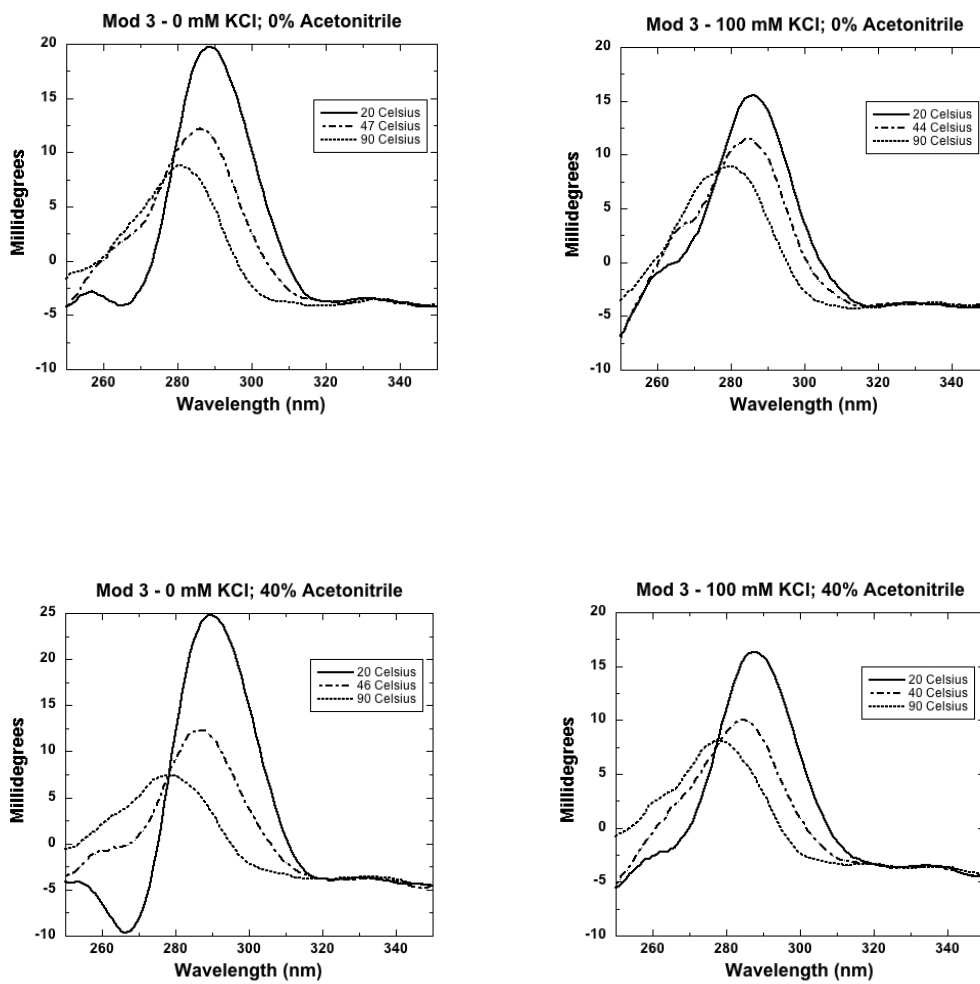

**Figure S10.** ECD spectra of VEGF  $iM_{mod3}$  at the pka exposed to 0 KCl (mM) / 0% acetonitrile, 100 mM KCl by itself, 40% acetonitrile by itself, and both 100 mM KCl / 40% acetonitrile present. Each spectra was collected at 20 °C, the determined  $T_M$ , and 90 °C.

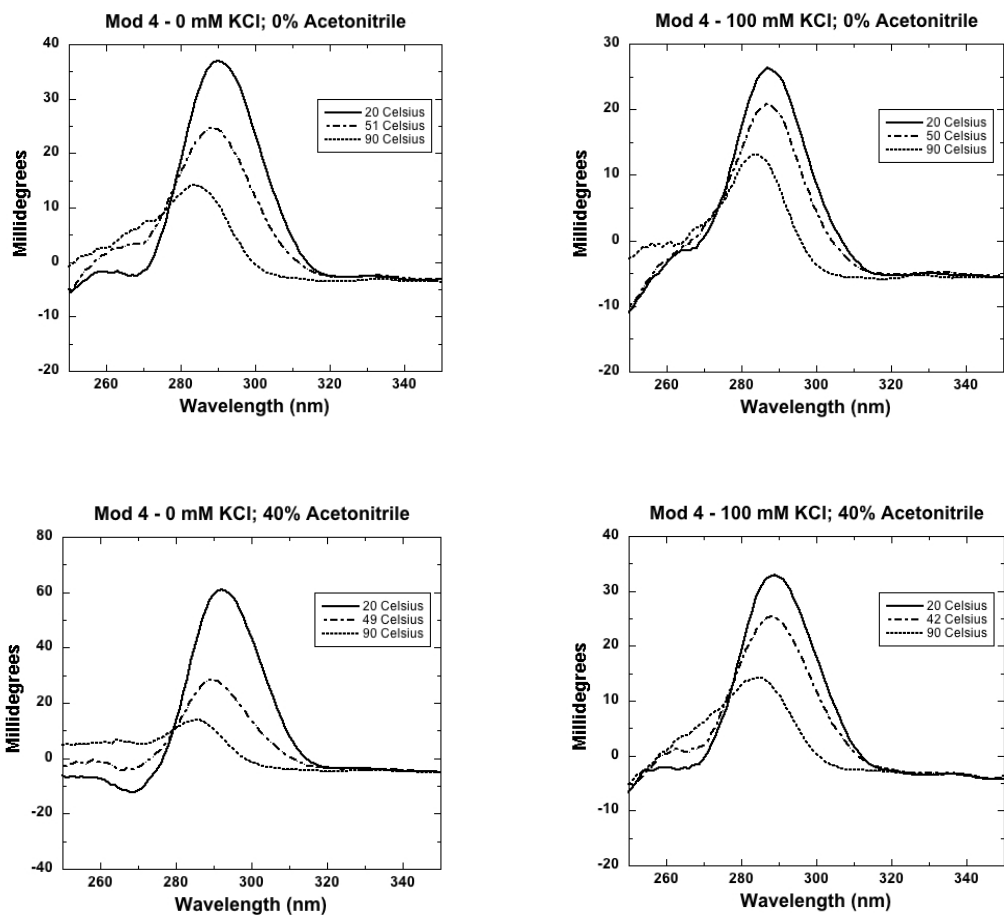

**Figure S11.** ECD spectra of VEGF  $iM_{mod4}$  at the pKa exposed to 0 KCl (mM) / 0% acetonitrile, 100 mM KCl by itself, 40% acetonitrile by itself, and both 100 mM KCl / 40% acetonitrile present. Each spectra was collected at 20 °C, the determined  $T_M$ , and 90 °C.

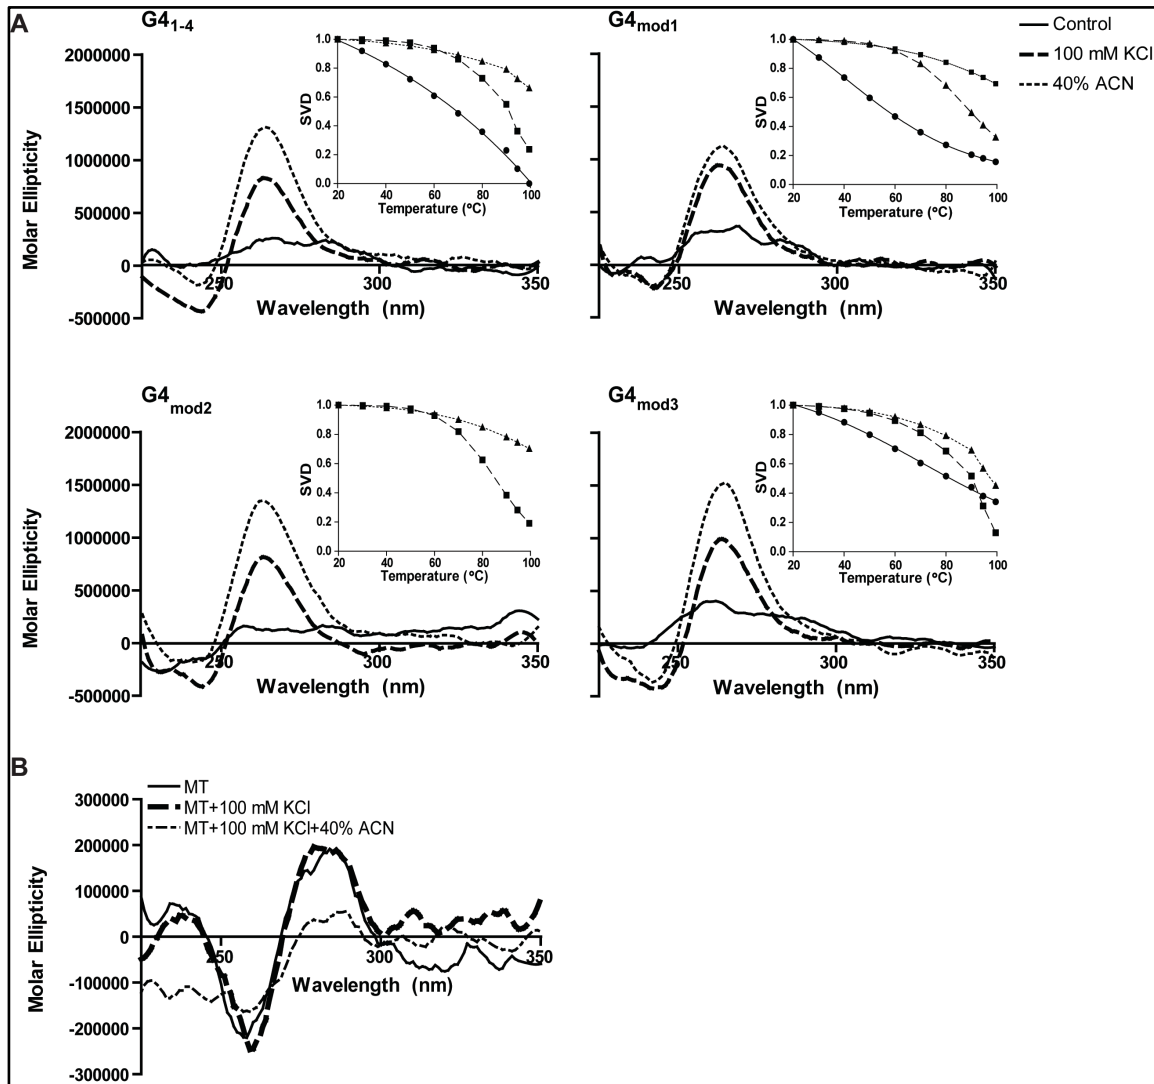

**Figure S12.** 5-hmC modifications within VEGF G4-forming region allows stable G4 formation with co-solvents. Upon addition of 100 mM KCl alone and combined with 40% ACN, maximal G4 formation occurred compared to control. Also, thermal stability markedly increased with each addition for all sequences (A) Total G-to-T mutations prevent G4 formation alone and in the presence of 100 mM KCl and 40% ACN (B)

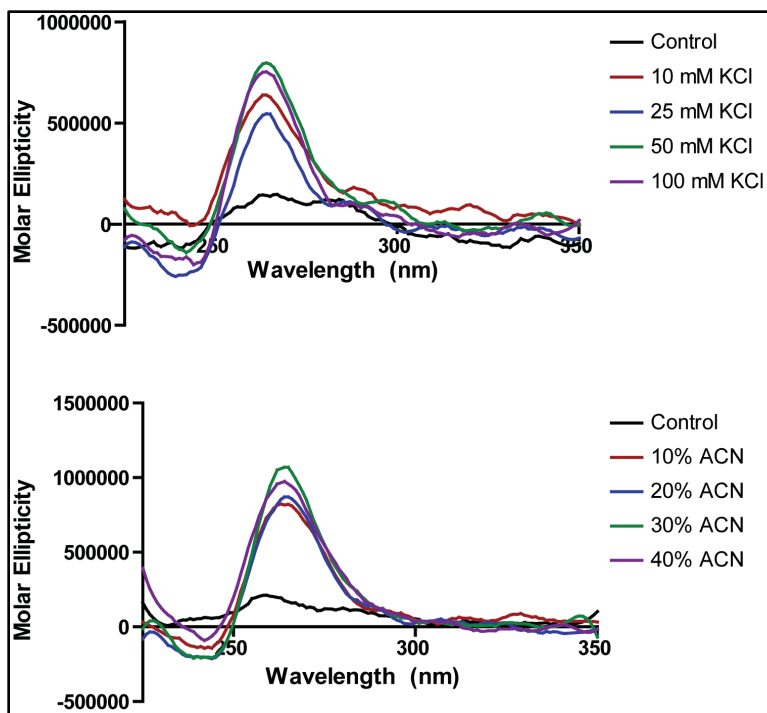

**Figure S13.** Determination of co-solvent concentrations needed for maximum VEGF<sub>1-4</sub> formation. 0-100 mM gradient of KCl was added to wild-type VEGF G4 to determine 10 mM KCl to be the minimal concentration affecting G4 formation markedly. Similarly, 0-40% of ACN, in 10% increments, were added to wild-type resulting in 30% ACN being identified for further study.

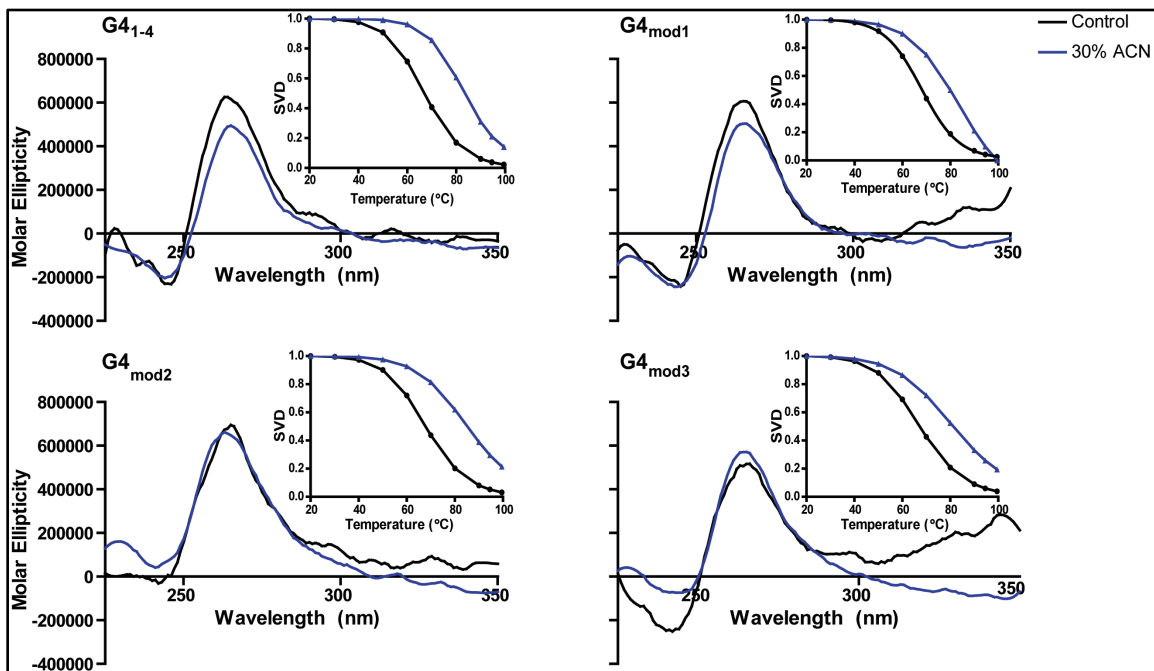

**Figure S14.** Low concentrations of co-solvents increase thermodynamic stability of modified VEGF structures. 30% ACN increase thermal profiles of each modification as compared to their own control (10 mM KCl)
